# Supplementary material for: A new triazine functionalized luminescent covalent organic framework for nitroaromatic sensing and CO2 storage
Source: Royal Society of Chemistry journal article supplement (doi:10.1039/c6ra01717g), 2016-01-01
Supplement: c6ra01717g1.pdf [file c6ra01717g1.pdf]

## Supporting Information

### A new triazine functionalized luminescent covalent organic framework for nitroaromatic sensing and CO<sub>2</sub> storage

Ruth Gomes and Asim Bhaumik\*

*Department of Materials Science, Indian Association for the Cultivation of Science, Jadavpur,  
Kolkata-700 032, India,*

*\*Corresponding author. E-mail: msab@iacs.res.in*

#### Table of content

|             |                                                                        |         |
|-------------|------------------------------------------------------------------------|---------|
| Section S1  | Spectroscopic data of the monomers                                     | Page 2  |
| Section S2  | Energy minimized structure                                             | Page 2  |
| Section S3  | Physico-chemical properties of TRIPTA                                  | Page 3  |
| Section S4  | CHN analysis data of TRIPTA                                            | Page 3  |
| Section S5  | HR-TEM analysis                                                        | Page 4  |
| Section S6  | FE-SEM analysis                                                        | Page 5  |
| Section S7  | Thermogravimetric analysis                                             | Page 6  |
| Section S8  | Effect of solvent on fluorescence property                             | Page 7  |
| Section S9  | Fluorescence spectrum of TRIPTA in various solvent                     | Page 8  |
| Section S10 | Solid state fluorescence spectrum of TRIPTA                            | Page 9  |
| Section S11 | UV-Vis spectra of acetonitrile suspension of TRIPTA in presence of TNP | Page 10 |
| Section S12 | TCSPC calculation for average fluorescence lifetime measurement        | Page 11 |
| Section S13 | Recyclability test for the CO <sub>2</sub> capture.                    | Page 12 |

## Section S1: Spectroscopic data of the monomers

### TAPT:

$^1\text{H}$  NMR (DMSO- $d_6$ , 500 MHz):  $\delta$  (ppm): 8.35 (d,  $J=8.5$ , 6H), 6.69 (d,  $J=8.5$ , 6H), 5.9 (s, 6H).

$^{13}\text{C}$  NMR (DMSO- $d_6$ , 125 MHz):  $\delta$  (ppm): 169.6, 152.9, 130.1, 122.9, 113.1.

HR-MS  $m/z$ : 355.24 ( $M^+$ , calculated for  $\text{C}_{21}\text{H}_{18}\text{N}_6$  354.41)

### TFP:

$^1\text{H}$  NMR ( $\text{CDCl}_3$ , 500 MHz):  $\delta$  (ppm): 14.116 (s, 3H), 10.153 (s, 3H).

$^{13}\text{C}$  NMR ( $\text{CDCl}_3$ , 125 MHz): 192.20, 173.74, 103.06.

## Section S2: Energy minimized structure

The energy minimization job of the hexagonal structure of TRIPTA was performed using chem.3D ultra 12.0 software. The resultant structure is shown below, where the summation of pore size (1.351 nm) and wall thickness (0.425 nm) is 1.776 nm which closely matches with the unit cell parameter 1.755 nm.

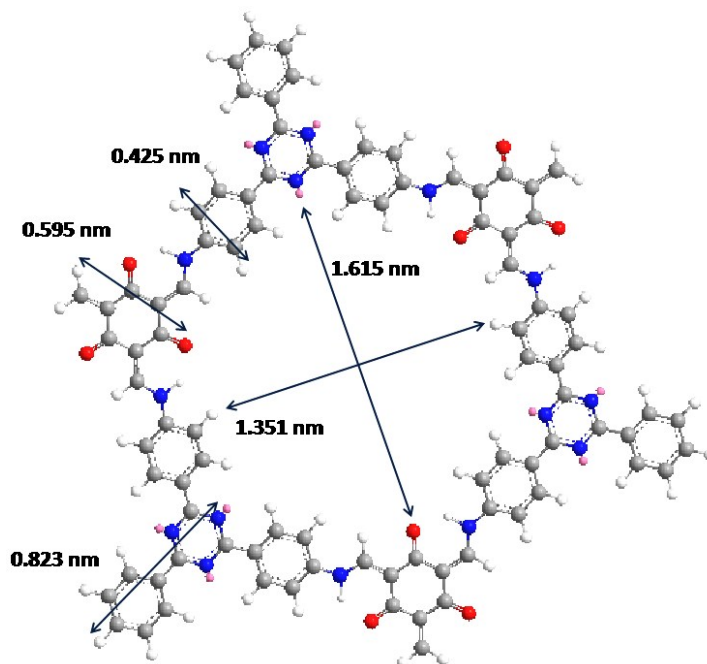

### Section S3 Physico-chemical properties of TRIPTA

**Table S1**

| Sample | $d_{100}$ (nm) | $a_{100}$ (nm) | $S_{\text{BET}}$ ( $\text{m}^2\text{g}^{-1}$ ) | $\text{PD}_{\text{NLDFT}}$ (nm) | PV ( $\text{cm}^3\text{g}^{-1}$ ) |
|--------|----------------|----------------|------------------------------------------------|---------------------------------|-----------------------------------|
| TRIPTA | 1.52           | 1.755          | 609                                            | 1.68                            | 0.351                             |

$d_{100}$  is the d(100) spacing.

$a_{100}$  (unit cell parameter) =  $2 d_{100}/\sqrt{3}$ .

$S_{\text{BET}}$  = BET surface area.

$\text{PD}_{\text{NLDFT}}$  is average pore diameter using NLDFT method.

PV is the total pore volume.

### Section S4: CHN analysis data of TRIPTA

**Table S2**

| TRIPTA       | C (%) | H (%) | N (%) | O (%) |
|--------------|-------|-------|-------|-------|
| Experimental | 63.93 | 4.05  | 14.97 | -     |
| Theoretical  | 63.77 | 4.25  | 14.90 | 17.00 |

**Section S5: HR-TEM analysis**

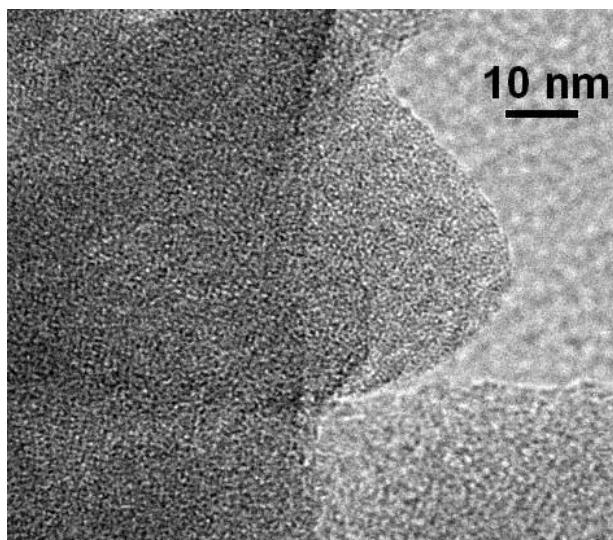

**Figure S1.** HR-TEM image of covalent organic framework TRIPTA

## Section S6: FE-SEM analysis

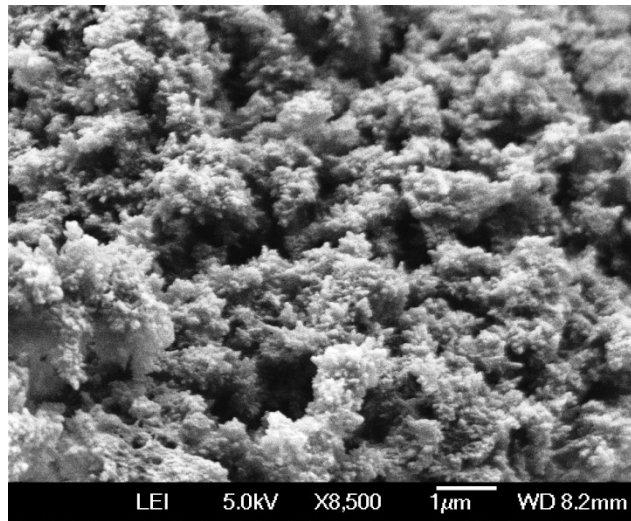

**Figure S2.** FE-SEM image of TRIPTA

## Section S7: Thermogravimetric analysis

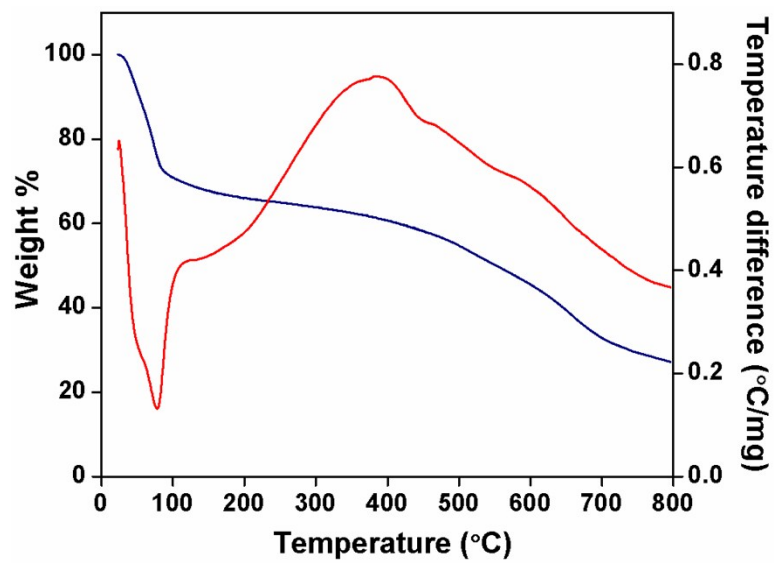

**Figure S3.** TGA (blue) and DTA (red) plot of TRIPTA

## Section S8: Effect of solvent on fluorescence property

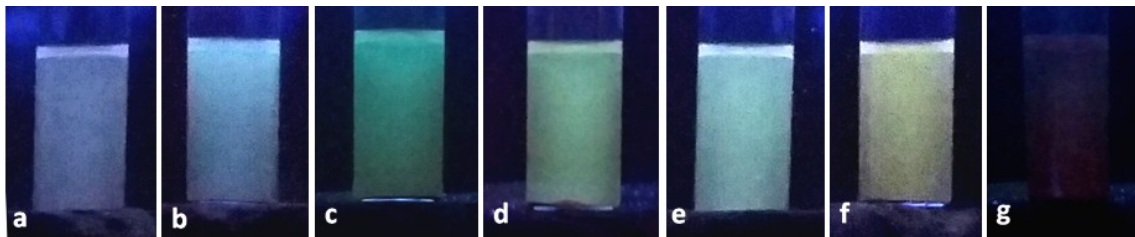

**Figure S4.** Photographic image of 0.5 mg/mL suspension of TRIPTA in various polar aprotic solvents, (a) chloroform, (b) dichloromethane, (c) tetrahydrofuran, (d) acetone, (e) N,N-dimethylformamide, (f) acetonitrile under UV light ( $\lambda_{\text{ex}} = 365 \text{ nm}$ ). (g) No fluorescence was observed in case of non-polar (cyclohexane, toluene) and polar protic (water, methanol, ethanol) solvents.

## Section S9: Fluorescence spectrum of TRIPTA in various solvent

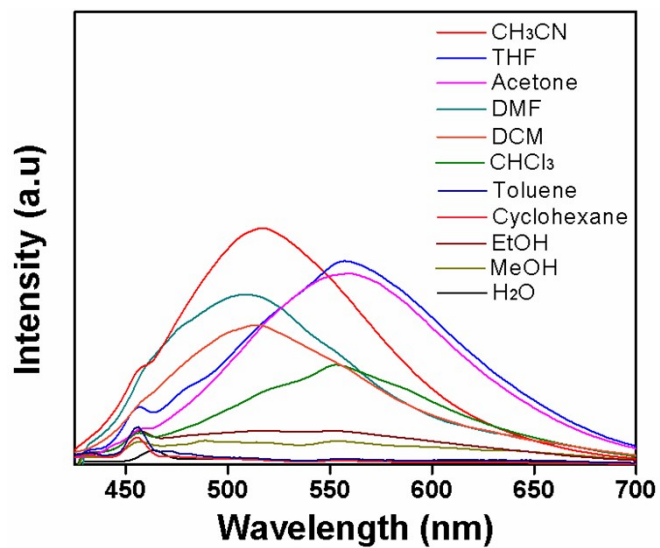

**Figure S5.** Photoluminescence spectra of TRIPTA suspended in various polar and non-polar solvents ( $\lambda_{\text{ex}} = 365 \text{ nm}$ ).



Section S10: Solid state fluorescence spectrum of TRIPTA

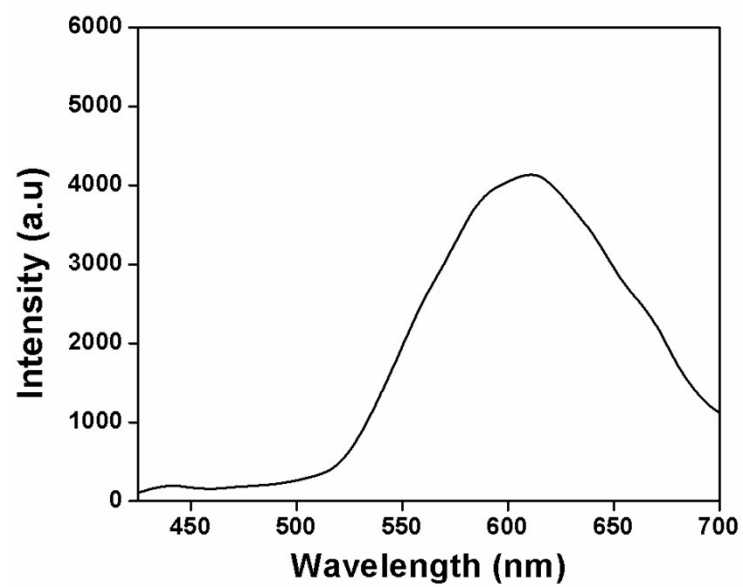

**Figure S6.** Solid state fluorescence spectrum of TRIPTA ( $\lambda_{\text{ex}} = 325$  nm).

Section S11: UV-Vis spectra of acetonitrile suspension of TRIPTA  
in presence of TNP

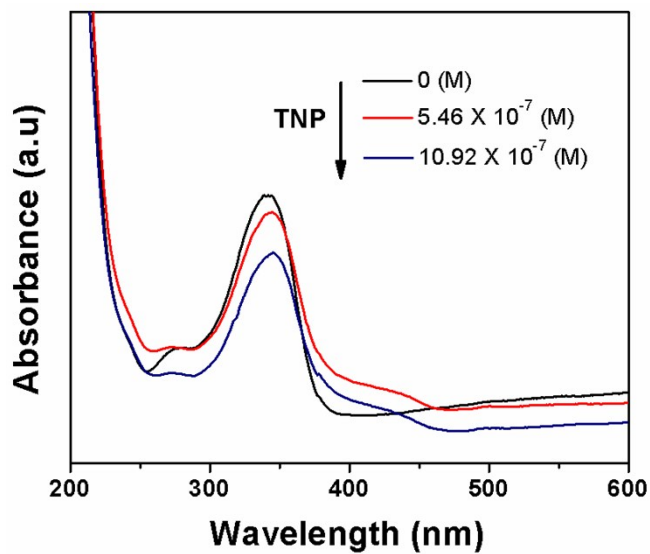

Figure S7. UV-Vis diffuse reflectance spectra of acetonitrile suspension of TRIPTA in presence of TNP

**Section S12 TCSPC calculation for average fluorescence lifetime measurement**

**Table S3**

| Sample         | T1   | T2   | T3   | B1    | B2    | B3    | SumB  | A1=[B1<br>/SumB] | A2=[B2<br>/SumB] | A3=[B1<br>/SumB] | <I><br>(ns) | $\chi^2$ |
|----------------|------|------|------|-------|-------|-------|-------|------------------|------------------|------------------|-------------|----------|
| TRIPTA         | 1.78 | 5.76 | 0.09 | 0.670 | 0.040 | 0.257 | 0.967 | 0.693            | 0.041            | 0.266            | 1.49        | 1.094    |
| TRIPTA<br>+TNP | 2.21 | 0.18 | 7.04 | 0.108 | 0.119 | 0.019 | 0.246 | 0.439            | 0.484            | 0.077            | 1.59        | 1.055    |
| TRIPTA<br>+DNP | 0.06 | 0.76 | 2.75 | 0.353 | 0.055 | 0.060 | 0.468 | 0.754            | 0.118            | 0.128            | 0.49        | 0.992    |
| TRIPTA<br>+DNT | 0.63 | 2.45 | 0.05 | 0.055 | 0.064 | 0.483 | 0.602 | 0.091            | 0.106            | 0.802            | 0.36        | 1.052    |
| TRIPTA<br>+NP  | 0.70 | 2.45 | 0.05 | 0.048 | 0.056 | 0.444 | 0.548 | 0.088            | 0.102            | 0.810            | 0.35        | 1.012    |

Where,  $\langle I \rangle = A1T1+A2T2+A3T3$  and  $\chi^2$  is the accuracy factor.

### Section S13: Recyclability test for the CO<sub>2</sub> capture

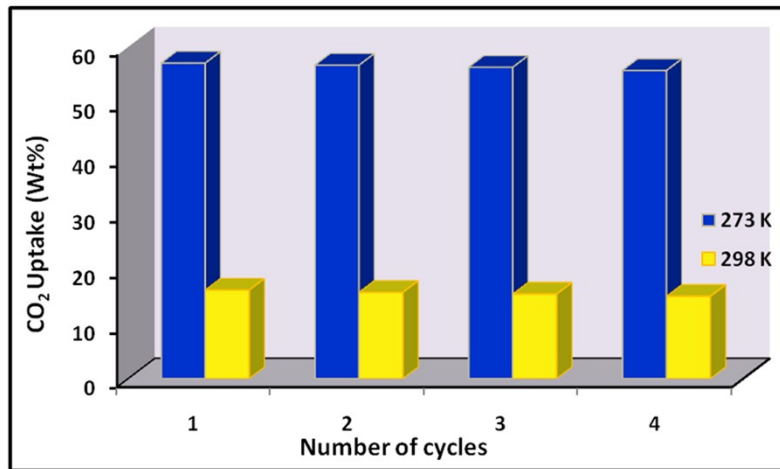

**Figure S8.** CO<sub>2</sub> adsorption capacity for recycled TRIPTA at 273 K and 298 K, 5 bar pressure
